# Supplementary material
Source: Research Square preprint supplement (doi:10.21203/rs.3.rs-8686557/v1)

**Graphical Abstract. Circadian blood pressure patterns and oxidative stress in normotensive individuals**

This graphical abstract illustrates the association between circadian blood pressure patterns assessed by 24-hour ambulatory blood pressure monitoring and systemic oxidative stress in normotensive individuals. The study cohort consisted of 127 normotensive participants who were classified as dipper, non-dipper, or reverse-dipper according to nocturnal systolic blood pressure behavior. Abnormal nocturnal blood pressure patterns, particularly the reverse-dipper phenotype, were associated with increased total oxidant status and oxidative stress index together with reduced total antioxidant capacity. An inverse relationship between nocturnal systolic blood pressure decline and oxidative stress index is highlighted, indicating that impaired nighttime blood pressure dipping is linked to a higher oxidative burden.


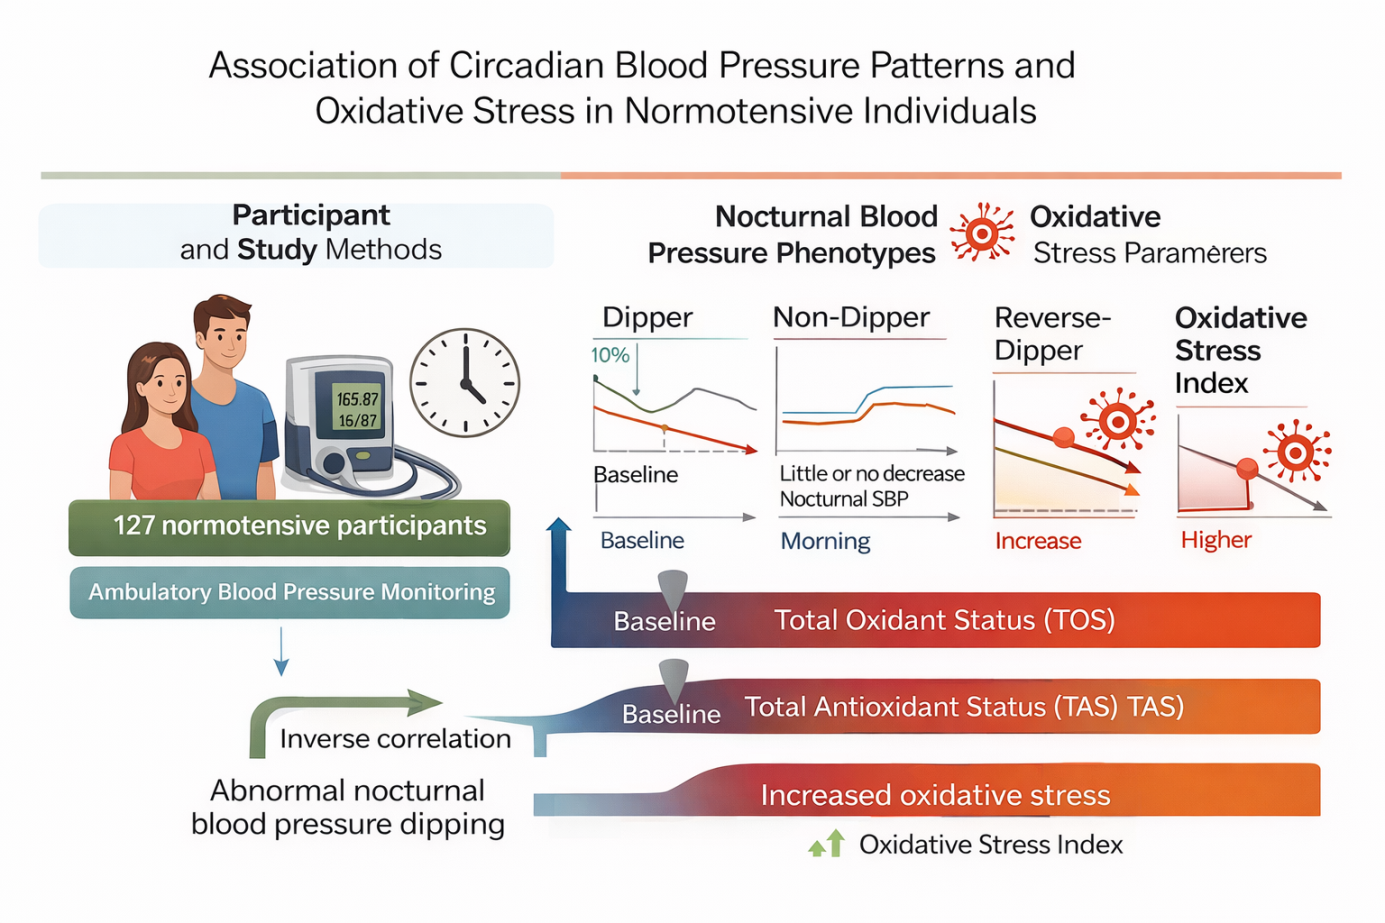

Supplement: Supplementary file 1 [file 75bcc992d7bcca269e078240.docx]
